# Supplementary material for: Implementation and evaluation of a new methane model within a dynamic global vegetation model: LPJ-WHyMe v1.3.1
Source: Copernicus journal article supplement (doi:10.5194/gmd-3-565-2010), 2010-10-27
Supplement: Supplementary file 1 [file gmd-3-565-2010-supplement.zip]

# Documentation for LPJ-WHyMe v1.3.1

Rita Wania

14 October 2010

## **Data model description and citation:**

Wania, R., I. Ross and I.C. Prentice (2010). Implementation and evaluation of a new methane model within a dynamic global vegetation model: LPJ-WHyMe v1.3.1. *Geoscientific Model Development* (accepted).

## **Last updated:**

14 October 2010

## **Scientific point of contact:**

Rita Wania  
School of Earth and Ocean Sciences  
University of Victoria  
PO Box 3065  
Victoria, BC, V8W 3V6  
Email: rita@wania.net  
Phone: (250) 721-6181

## **Further references:**

Wania, R., I. Ross and I. C. Prentice (2009a). Integrating peatlands and permafrost into a dynamic global vegetation model: 1. Evaluation and sensitivity of physical land surface processes, *Global Biogeochemical Cycles*, 23, GB3014, doi:10.1029/2008GB003412.

Wania, R., I. Ross and I. C. Prentice (2009b). Integrating peatlands and permafrost into a dynamic global vegetation model: 2. Evaluation and sensitivity of

vegetation and carbon cycle processes, *Global Biogeochemical Cycles*, 23, GB3015, doi:10.1029/2008GB003413.

### **Target compute platform:**

The model can be run on any platform.

### **Model build environment:**

Fortran 77 and C++. The code can be compiled by using freely available compilers such as ifort, g77 and gcc.

### **Additional analysis environment requirements:**

LPJ-WHyMe produces NetCDF files, which can be viewed and processed in any suitable environment. To analyse the data, we used the *CDO* and *NCO* tools and to view and plot the data we used data visualisation software such as *Ferret* or *NCL*, all of these are freely available software packages and are just listed as examples.

CDO: <http://www.mad.zmaw.de/Pingo/post/post.cdo.home.html>

NCO: <http://nco.sourceforge.net/>

Ferret: <http://ferret.wrc.noaa.gov/Ferret/>

NCL: <http://www.ncl.ucar.edu/>

### **Detailed instructions:**

First, we provide a list of all the directories and files. The material is split up into five directories, `utils`, `src`, `doc` and `data`.

#### **The utils directory**

The `utils` directory contains auxiliary code for the use of the input/output driver (`lpjio.cpp`), which uses NetCDF files as input and output. Written by Ian Ross.

|                              |                                           |
|------------------------------|-------------------------------------------|
| <code>apply-base.cpp</code>  | C++ auxiliary file.                       |
| <code>Array.cpp</code>       | C++ auxiliary file.                       |
| <code>Array.hh</code>        | C++ header file.                          |
| <code>clamp-value.cpp</code> | C++ auxiliary file.                       |
| <code>ncminmax.cpp</code>    | C++ auxiliary file.                       |
| <code>Makefile</code>        | File to link and compile the above files. |

## The src directory

The main LPJ-WHyMe source code and driver file are located in this directory.

|                           |                                                                                         |
|---------------------------|-----------------------------------------------------------------------------------------|
| <code>lpjmain.f</code>    | Main LPJ-WHyMe code (Fortran 77).                                                       |
| <code>params.cb</code>    | Common block containing parameter values.                                               |
| <code>inputvars.cb</code> | Common block containing definition of climate input variables.                          |
| <code>soilvars.cb</code>  | Common block containing definition of soil relevant variables.                          |
| <code>vegvars.cb</code>   | Common block containing definition of vegetation relevant variables.                    |
| <code>ch4vars.cb</code>   | Common block containing definition of methane relevant variables.                       |
| <code>lpjio.cpp</code>    | C++ driver for LPJ-WHyMe, used to handle input and output files. (Written by Ian Ross.) |
| <code>Makefile</code>     | File to link and compile the code.                                                      |

## The data directory

In the subdirectory `global`, we provide the land mask and soil type data on a  $1^\circ \times 1^\circ$  resolution for the region  $60^\circ\text{S}$  to  $90^\circ\text{N}$ . The soil type map is based on the FAO data set, but is overlain by soil organic carbon data from the IGBP-DIS data set [Global Soil Data Task Group, 2000]. As climate input data, we used either a climatology or a time series data set provided by the Climate Research Unit (CRU) at the University of East Anglia, United Kingdom [New et al., 1999, Mitchell and Jones, 2005]. Here, we provide data only for one example grid cell from the CRU CL 1.0 climatology data set, as we cannot distribute the global data sets. The global data are on a  $0.5^\circ \times 0.5^\circ$  resolution and can be downloaded at <http://www.cru.uea.ac.uk/cru/data/hrq.htm>.

The subdirectory `example-site` contains data from the Degerö site in Sweden.

|                               |                                                                                                                                                                                                                       |
|-------------------------------|-----------------------------------------------------------------------------------------------------------------------------------------------------------------------------------------------------------------------|
| <code>pftin.dat</code>        | Plant functional type parameter file, read by <code>lpjmain.f</code> .                                                                                                                                                |
| <code>lpj.cfg</code>          | Configuration file giving names of input files and output variables. Description of <code>lpj.cfg</code> file format and <code>lpjio.cpp</code> driver can be found in <code>doc/USING-The-netCDF-Driver.txt</code> . |
| <code>lpj_land_mask.nc</code> | Land/ocean mask.                                                                                                                                                                                                      |
| <code>lpj_soil_type.nc</code> | Soil type map.                                                                                                                                                                                                        |

|                         |                                                                                                     |
|-------------------------|-----------------------------------------------------------------------------------------------------|
| <code>tas.nc</code>     | Monthly mean temperature ( $^{\circ}\text{C}$ ) from the CRU CL 1.0 climatology [New et al., 1999]. |
| <code>pr.nc</code>      | Monthly mean precipitation (mm per month) from the CRU CL 1.0 climatology [New et al., 1999].       |
| <code>clt.nc</code>     | Monthly mean cloud cover (%) from the CRU CL 1.0 climatology [New et al., 1999].                    |
| <code>wetdays.nc</code> | Monthly mean wet days from the CRU CL 1.0 climatology [New et al., 1999].                           |

## Running LPJ-WHyMe

To run LPJ-WHyMe using the provided test data:

1. In the `utils` directory, ensure that all paths are set correctly in the `Makefile`. Then type `make`.
2. In the `src` directory, ensure that all paths are set correctly in the `Makefile`. Then type `make`.
3. Copy the `pftin.dat` and `lpj.cfg` files into the `data` directory. Run the `lpj-whyme` executable produced in step 2 in the `data` directory.
4. An output file called `out_xxxx.nc`, where `xxxx` stands for the output year, will be produced in the `data` directory. The units for each variable are given in `lpjmain.f` or the common block files.

## References

- Global Soil Data Task Group. *Global gridded surfaces of selected soil characteristics (IGBP-DIS)*. Oak Ridge National Laboratory Distributed Active Archive Center, Oak Ridge, Tennessee, U.S.A., 2000. <http://www.daac.ornl.gov>.
- T. D. Mitchell and P. D. Jones. An improved method of constructing a database of monthly climate observations and associated high-resolution grids. *Int. J. Climatol.*, 25(6):693–712, May 2005.
- M. New, M. Hulme, and P. D. Jones. Representing twentieth century space-time climate variability. Part 1: Development of a 1961–1990 mean monthly terrestrial climatology. *J. Clim.*, 12:829–856, 1999.
